# Supplementary material
Source: Springer Nature journal article supplement (https://www.springermedizin.de/resource/supplementary/12906_2012_1249_MOESM2_ESM.pdf/9520206)
Supplement: MOESM2 [file 9520206]

Breast cancer  
sample

92 patients

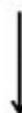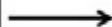

20 had not used any  
kind of CAM during  
the previous 12 months

72 CAM users

| 1. Visited health care providers (of CAM)                                                                                              | 2. Complementary treatments received from physicians                                    | 3. Use of herbal medicine and dietary supplements                           | 4. Self-help practice                                                                       |
|----------------------------------------------------------------------------------------------------------------------------------------|-----------------------------------------------------------------------------------------|-----------------------------------------------------------------------------|---------------------------------------------------------------------------------------------|
| 24 (26% of 92 respondents) visited one or more providers, 66 (72%, incl. N=20 non-CAM users) did not go to a CAM health care provider. | 26 (28%) received one or more CAM therapies, 63 (68%) had not received any CAM therapy. | 55 (60%) used one or more products, 31 (34%) had not used any CAM products. | 51 (55%) used one of the self-help practices, 38 (41%) had not used any self-help practice. |

Internet  
sample

210 respondents

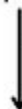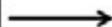

31 had not used any  
kind of CAM during  
the previous 12 months

71 frequent users (FU)/123 infrequent users (IFU)/16 did not know

| 1. Visited health care providers (of CAM)                                                                        | 2. Complementary treatments received from physicians                                                  | 3. Use of herbal medicine and dietary supplements                                         | 4. Self-help practice                                                                                     |
|------------------------------------------------------------------------------------------------------------------|-------------------------------------------------------------------------------------------------------|-------------------------------------------------------------------------------------------|-----------------------------------------------------------------------------------------------------------|
| <b>FU (N=71)</b><br>52 (73%) visited one or more providers, 19 (27%) did not go to a CAM health care provider.   | <b>FU</b><br>48 (68%) received one or more CAM therapies, 23 (32%) had not received any CAM therapy.  | <b>FU</b><br>62 (87%) used one or more products, 8 (11%) had not used any CAM products.   | <b>FU</b><br>40 (56%) used one of the self-help practices, 31 (44%) had not used any self-help practice.  |
| <b>IFU (N=123)</b><br>34 (28%) visited one or more providers, 89 (72%) did not go to a CAM health care provider. | <b>IFU</b><br>53 (43%) received one or more CAM therapies, 70 (57%) had not received any CAM therapy. | <b>IFU</b><br>79 (64%) used one or more products, 44 (36%) had not used any CAM products. | <b>IFU</b><br>59 (48%) used one of the self-help practices, 64 (52%) had not used any self-help practice. |
